# Supplementary material
Source: ML conference proceedings conference paper supplement (https://openreview.net/forum?id=OferBmc2zT)
Supplement: supplementary_material [file iclr_supplement_reasoning_renfei-6.pdf › iclr2026/iclr_supplement_reasoning_renfei-6.pdf]

## A TECHNICAL APPENDICES AND SUPPLEMENTARY MATERIAL

### A.1 ZERO-SHOT PROMPT TEMPLATES

We present four prompt templates used in MedConceptsQA and IPC, which are designed to elicit specific responses from language models. These templates request:

- Direct answers, both with and without explanations.
- Structural recall of codes and a stepwise elimination of incorrect options.
- An open-ended reasoning process that repeats the recall and elimination tasks but without providing any options.

#### Prompt Template 1: MCQ with Final Answer Only

Answer only A,B,C,D according to the answer to this multiple choice question.  
[... Insert Question Text Here ...]  
**Answer (only the letter of your choice (A, B, C, or D)):**

#### Prompt Template 2: MCQ with Explanation

You are a medical research assistant. Read the following multiple-choice question carefully. Your task is to:

1. Answer each question with one of A/B/C/D, which corresponds to the four options.
2. For my convenience, please give me a list of ANSWERS for the given instances in the format 'Answer: ...', with additional explanation for each answer in the format 'Explanation: ...'.

Respond in the following format:

Answer: <A/B/C/D>

Explanation: <your explanation here>

[... Insert Question Text Here ...]

**Answer:**

**Explanation:**

#### Prompt Template 3: MCQ with Stepwise Reasoning

You are a medical classification expert. For each option, first **recall the general category and structure breakdown of the medical code**, then explain **why it might be wrong**. Finally pick the correct one.

[... Insert Question Text Here ...]

**Steps to follow:**

1. Recall the general category and structural break down of the code.
2. Evaluate each option (A–D) briefly.
3. Choose the best option and justify.

**Answer format:**

Step 1: . . .

Step 2A: . . .

Step 2B: . . .

Step 2C: . . .

Step 2D: . . .

Final Answer: [A/B/C/D] because . . .

#### Prompt Template 4: Open-Ended Question (No Options)

You are a medical classification expert. For each question, first **recall the general category and structure breakdown of the medical code**, then **state the final answer**.

[... Insert Main Question Extracted from Text Here ...]

##### Steps:

1. Recall the general category and structural break down of the code.
2. State your only final answer.

##### Answer format:

Step 1: . . .

Step 2 Final Answer:

#### A.2 EXAMPLES ON MODEL RESPONSES UNDER VARIOUS PROMPTS

##### Example: Medical Code Analysis (Question)

**Question:** What is the description of the medical code P02CX03 in ATC?

- A. moxidectin
- B. pyrvinium
- C. ANTINEMATODAL AGENTS
- D. bephenium

**Ground Truth Answer:** A

**Vocab:** ATC

**Level:** hard

##### V3 Model Response Under Template 4 (Open-Ended, Incorrect)

###### STEP 1: CODE BREAKDOWN

The ATC code P02CX03 is part of the P02 category (anthelmintics), specifically under P02C (other anthelmintics). The "X" indicates a miscellaneous subgroup, and "03" is the specific substance.

###### STEP 2 FINAL ANSWER

tribendimidine

**Final Answer:** tribendimidine

**Correct:** False

##### R1 Model Response Under Template 4 (Open-Ended, Incorrect),

###### STEP 1: CODE BREAKDOWN

The ATC code P02CX03 breaks down as follows:

- **P:** Antiparasitic products, insecticides, and repellents
- **P02:** Anthelmintics (drugs for parasitic worms)
- **P02C:** Antitrematodal agents (targeting fluke infections)
- **P02CX:** Other antitrematodal agents
- **03:** Specific substance identifier for artemether.

###### STEP 2 FINAL ANSWER

artemether

**Final Consolidated Answer:** artemether

**Correct:** False

### V3 Model Response Under Template 3 (Incorrect)

STEP 1: RECALL THE GENERAL CATEGORY AND STRUCTURAL BREAKDOWN OF THE CODE

- **ATC Code Structure:**

- **P:** Antiparasitic products, insecticides, and repellents (anatomical main group).
- **P02:** Anthelmintics (therapeutic subgroup).
- **P02C:** Antinematodal agents (pharmacological subgroup).
- **P02CX:** Other antinematodal agents (chemical subgroup).
- **P02CX03:** Pyrvinium (specific substance).

Thus, **P02CX03** is a code for **pyrvinium**, an antinematodal agent under "other antinematodal agents."

STEP 2: EVALUATE EACH OPTION

**A. moxidectin**

*Why it's wrong:* moxidectin is an antiparasitic drug, but its ATC code is **P02CX06**, not P02CX03.

**B. pyrvinium**

*Why it's correct:* matches the exact ATC code **P02CX03** for pyrvinium.

**C. ANTINEMATODAL AGENTS**

*Why it's wrong:* while **P02C** is the category for antinematodal agents, **P02CX03** is a specific drug (pyrvinium), not the entire group.

**D. bephenium**

*Why it's wrong:* bephenium is an antinematodal agent, but its ATC code is **P02CX01**, not P02CX03.

FINAL ANSWER: [B] BECAUSE P02CX03 CORRESPONDS SPECIFICALLY TO PYRVINIUM IN THE ATC CLASSIFICATION.

**Final Answer: B**

**Correct: False**

### R1 Model Response Under Template 3 (Correct)

#### STEP 1: CODE BREAKDOWN

The ATC code **P02CX03** breaks down as follows:

- **P**: Antiparasitic products
- **P02**: Anthelmintics
- **P02C**: Antinematodal agents (3rd level)
- **P02CX**: Other antinematodal agents (4th level)
- **P02CX03**: Specific substance (5th level)

#### STEP 2: OPTION EVALUATION

##### **A. moxidectin**

*Evaluation:* Plausible as it is an anthelmintic, but its classification under P02CX03 must be confirmed.

##### **B. pyrrvinium**

*Evaluation:* Is assigned to **P02CX01**, making this incorrect for CX03.

##### **C. ANTINEMATODAL AGENTS**

*Evaluation:* Refers to the 3rd level (**P02C**), not the 5th-level substance code.

##### **D. bephenium**

*Evaluation:* Is classified under **P02CA01** (tetrahydropyrimidine derivatives), not P02CX.

**FINAL ANSWER:** [A] BECAUSE P02CX03 CORRESPONDS TO MOXIDECTIN IN THE ATC CLASSIFICATION, WHILE OTHER OPTIONS ARE EITHER INCORRECT CODES (B, D) OR A CATEGORY-LEVEL DESCRIPTOR (C).

**Final Answer:** A

**Correct:** True

### A.3 IPC CODES EXAMPLES GROUPED BY DIFFERENT MEMORY RECALL LEVELS

#### A.3.1 MEMORY-LIGHT (0-2 HIERARCHICAL RECALLS)

**Level Decoding:** This tests the ability to decode a hierarchical code (in this case, F02B 19/00) by identifying its constituent parts, such as Section, Class, Subclass, and Group.

#### Memory-Light Questions - Level Decoding

**Question:** In F02B 19/00, identify the Section, Class, Subclass, and Group.

**Options:**

- A) Section=F, Class=02, Subclass=B, Group=19/00
- B) Section=F, Class=2, Subclass=B, Group=19
- C) Section=B, Class=19, Subclass=F, Group=02/00
- D) Section=F, Class=02B, Subclass=19, Group=00

**Answer:** A

**Description:** Engines with precombustion chambers

**Parent Lookup:** This task requires the model to identify the parent of a given patent code. It is a Memory-Light task as it involves one memory recall to find the direct ancestor.

### Memory-Light Questions - Parent Lookup

**Question:** The immediate parent of F02B 1/04 is:

**Options:**

- A) F02B 1/00
- B) F02B 1/02
- C) F02B 1/06
- D) F02B

**Answer:** A

**Description:** Engines characterised by fuel-air mixture compression

**Grandparent Lookup:** This task requires the model to identify the second-level ancestor of a given patent code. It is a Memory-Light task as it involves a short, direct traversal up the hierarchy to find a specific ancestor.

### Memory-Light Questions - Grandparent Lookup

**Question:** Second-level ancestor of D01G 15/68 is:

**Options:**

- A) D01G 15/64
- B) D01G 15/46
- C) D01G 15/12
- D) D01G 15/00

**Answer:** B

**Reasoning:** D01G 15/68 → D01G 15/64 → D01G 15/46

**Sibling Discrimination:** This is a Memory-Light task that requires the model to identify a code that shares the same main group but has a different subgroup. It tests the model's ability to recognize and compare codes at a shallow hierarchical level.

### Memory-Light Questions - Sibling Discrimination

**Question:** Which is a sibling (same main group, different subgroup) of F02B 53/12?

**Options:**

- A) F02B 55/12
- B) F02B 53/00
- C) F02B 53/10
- D) F03B 53/06

**Answer:** C

**Description:** Ignition for rotary-piston engines

### A.3.2 MEMORY-MODERATE (3-4 HIERARCHICAL RECALLS)

**Great-grandparent Lookup:** This is a more challenging task that requires tracing a code's lineage back three levels to find the correct ancestor. Classified as a Memory-Moderate task, it tests the model's ability to handle slightly longer and more complex hierarchical paths.

### Memory-Moderate Questions - Great-grandparent Lookup

**Question:** Third-level ancestor of C01B 32/194 is:

**Options:**

- A) C01B 32/00
- B) C01B
- C) C01B 32/18
- D) C01B 32/19

**Answer:** A

**Reasoning:** C01B 32/194 → C01B 32/19 → C01B 32/18 → C01B 32/00

**Path Reconstruction:** This Memory-Moderate task challenges the model to reconstruct the full descriptive name chain for a given patent code. It tests the model's ability to accurately recall and order the hierarchical labels (Section, Class, Subclass, etc.) that lead to a specific code.

#### Memory-Moderate Questions - Path Reconstruction

**Question:** Give the name chain for F02B 19/00 from Section → Class → Subclass → Main group

**Options:**

- A) Mechanical Engineering → Pumps → Piston Engines → Precombustion Chambers
- B) Mechanical Engineering → Combustion Engines → Piston Engines → Engines with precombustion chambers
- C) Lighting → Engines → Combustion Engines → Precombustion Chambers
- D) Mechanical Engineering → Combustion Engines → Gas Turbines → Precombustion Chambers

**Answer:** B

**Description:** Engines with precombustion chambers

#### A.3.3 MEMORY-HEAVY (5 OR MORE HIERARCHICAL RECALLS)

**Cousin Relationship:** This is a Memory-Heavy task that tests the model's ability to understand lateral relationships within the hierarchy. It requires traversing up to a common grandparent and then back down to identify a "first cousin" that shares the same ancestor.

#### Memory-Heavy Questions - Cousin Relationship

**Question:** First cousin of H04N 9/806 (same grandparent level) is:

**Options:**

- A) H04N 9/808
- B) H04N 9/815
- C) H04N 9/82
- D) H04N 9/804

**Answer:** B

**Reasoning Paths:**

- H04N 9/806 → H04N 9/804 (parent) → H04N 9/80 (grandparent) → H04N 9/808 (uncle/aunt)
- H04N 9/806 → H04N 9/804 (parent) → H04N 9/80 (grandparent) → H04N 9/81 (uncle/aunt) → H04N 9/815 (cousin)
- H04N 9/806 → H04N 9/804 (parent) → H04N 9/80 (grandparent) → H04N 9/82 (uncle/aunt)
- H04N 9/806 → H04N 9/804 (parent) → H04N 9/80 (grandparent) → H04N 9/804 (uncle/aunt)

**Deepest Descent:** This Memory-Heavy question asks the model to identify the most specific descendant of a given patent code from a list of options. It tests the model's ability to perform deep, multi-step traversal down the hierarchy to determine which option has the longest, most specific path.

972  
973  
974  
975  
976  
977  
978  
979  
980  
981  
982  
983  
984  
985  
986  
987  
988  
989  
990  
991  
992  
993  
994  
995  
996  
997  
998  
999  
1000  
1001  
1002  
1003  
1004  
1005  
1006  
1007  
1008  
1009  
1010  
1011  
1012  
1013  
1014  
1015  
1016  
1017  
1018  
1019  
1020  
1021  
1022  
1023  
1024  
1025

### Memory-Heavy Questions - Deepest Descent

**Question:** Most specific descendant of A01B 3/00 among these options:

**Options:**

- A) A01B 3/04
- B) A01B 3/426
- C) A01B 3/08
- D) A01B 3/26

**Answer:** B

**Reasoning Paths:**

- A01B 3/00 → A01B 3/04
- A01B 3/00 → A01B 3/36 → A01B 3/40 → A01B 3/42 → A01B 3/426
- A01B 3/00 → A01B 3/04 → A01B 3/06 → A01B 3/08
- A01B 3/00 → A01B 3/24 → A01B 3/26

**Orphan Detection:** As a Memory-Heavy task, this question asks the model to identify which of the given code pairs does not represent a valid parent-child relationship. This tests the model's deep knowledge of the hierarchical structure and its ability to spot inconsistencies.

### Memory-Heavy Questions - Orphan Detection

**Question:** Which does not represent a valid parent-child relationship?

**Options:**

- A) D01F 6/26 → D01F 6/28
- B) D01G 19/14 → D01G 19/16
- C) D01B 5/02 → D01B 5/04
- D) D01D 1/06 → D01D 1/09

**Answer:** A

**Reasoning:**

- D01B 1/14 → D01B 1/18
- D01F 2/24 → D01F 2/28 → D01F 2/30 (not D01F 2/06)
- D01G 15/76 → D01G 15/78 (not D01G 15/74)
- D01D 5/04 is parallel to D01D 5/08, not a child

**Common Ancestor:** This task can range from Memory-Light to Memory-Heavy, depending on the codes provided. It requires the model to navigate the hierarchical paths of two different codes to find their nearest shared ancestor, testing both traversal and comparison skills. Below is an example showing the highest retrieval complexity:

#### Memory-Heavy Questions - Common Ancestor

**Question:** Nearest common ancestor of A01B 3/421 and A01B 15/06 is:

**Options:**

- A) A01B 3/00
- B) A01B 15/00
- C) A01B
- D) A01

**Answer:** C

**Hierarchical Paths:**

- A01B 3/421 → A01B 3/42 → A01B 3/40 → A01B 3/36 → A01B 3/00 → A01B
- A01B 15/06 → A01B 15/04 → A01B 15/02 → A01B 15/00 → A01B

## B ADDITIONAL RESULTS

### B.1 STRUCTURED PROMPTING AND MODEL PERFORMANCE

Figure 3 presents dumbbell plots that illustrate how structured prompting can narrow the performance gap between base and enhanced language models on hierarchical classification tasks. The plots compare accuracy across different model families and enhancement categories, such as instruction-tuned and reasoning-enhanced models. The key finding is that using structured prompts effectively reduces the performance advantage of specialized models, suggesting prompt engineering can be a powerful alternative to other methods like reinforcement learning.

## C USE OF LLMs

We made use of LLMs to perform tasks including the polishing of our writing and the LaTeX formatting of the manuscript. It is important to note that no new ideas were introduced by these models. The sole exception is where the focus of our research, prompt optimization, made us use the extraction and analysis of the LLMs' own responses.



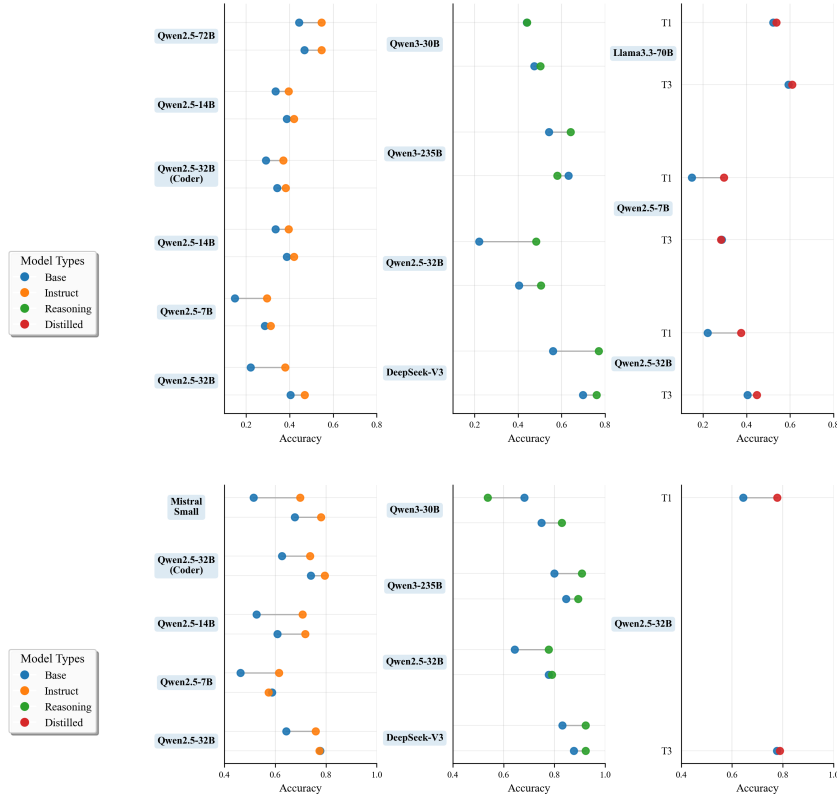

Figure 3: **Dumbbell plots revealing performance gap compression through structured prompting.** Accuracy comparison between base and enhanced models on (a) MedConceptsQA and (b) IPC codess across Templates 1 and 3. Each dumbbell connects base model performance (left endpoint) to enhanced model performance (right endpoint), with line length representing the performance gap. Model pairs span three enhancement categories: *Instruction-tuned* (Qwen2.5-7B/14B/32B/72B→Instruct, Qwen2.5-32B→Coder, Mistral-Small→Instruct), *Reasoning-enhanced* (Deepseek-V3→R1, Qwen2.5-32B→QwQ-32B, Qwen3-30B-A3B-Instruct→Thinking-2507, Qwen3-235B-A22B-Instruct→Thinking-2507), and *Distilled* (Qwen2.5-7/32B→R1-Distill-Qwen-7/32B, Llama3.3-70B-Instruct→R1-Distill-Llama-70B). The systematic compression of dumbbells from Template 1 to Template 3 demonstrates how structured prompting narrows or eliminates performance advantages of specialized models. Notably, several base models with Template 3 achieve parity or exceed their enhanced counterparts’ Template 1 performance, validating prompt engineering as an alternative to RL.
